# Supplementary material for: MiR-185 targets POT1 to induce telomere dysfunction and cellular senescence
Source: Aging (Albany NY). 2020 Jul 18;12(14):14791–807. doi: 10.18632/aging.103541 (PMC7425516; doi:10.18632/aging.103541)
Supplement: Supplementary Figures [file aging-12-103541-s002..pdf]

## SUPPLEMENTARY FIGURES

hsa-miR-185 3' aguccuUGACGG - - AAAGAGAGGu 5'

| : | | | : | | | | | | | |

Human 5' ...gguuuuAUUGCUUGUUUCUCUCCa... 3' POT1-3'UTR (361-384)

Chimpanzee 5' ...gguuuuAUUGCUUGUUUCUCUCCa... 3'

Rhesus 5' ...gauuugAUUGCUUGUUUCUCUCCa... 3'

Supplementary Figure 1. The predicted target site of miR-185 within POT1 3'UTR appears conserved across primate species.

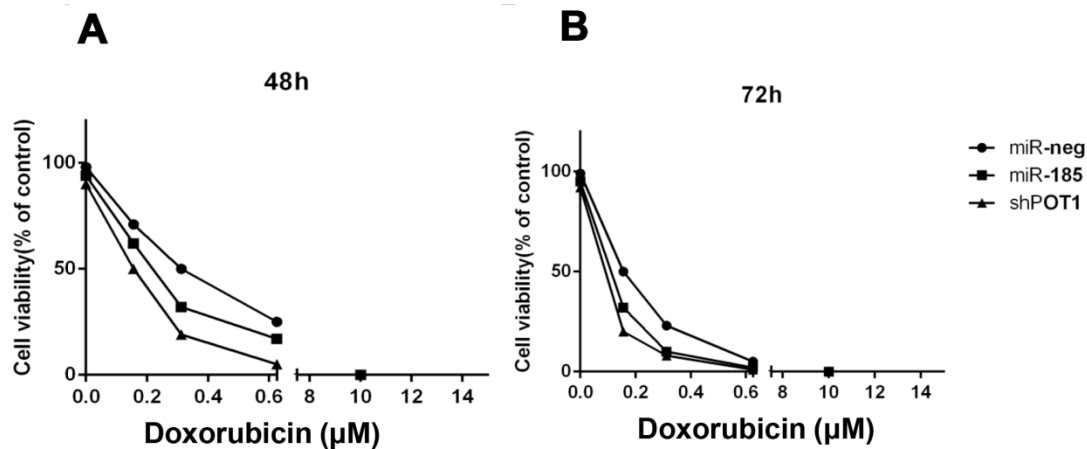

Supplementary Figure 2. The sensitivity to chemotherapy drug doxorubicin of HTC75 cells after 48 hours (A) and 72 hours (B) with POT1 knocking down and miR185 overexpression.

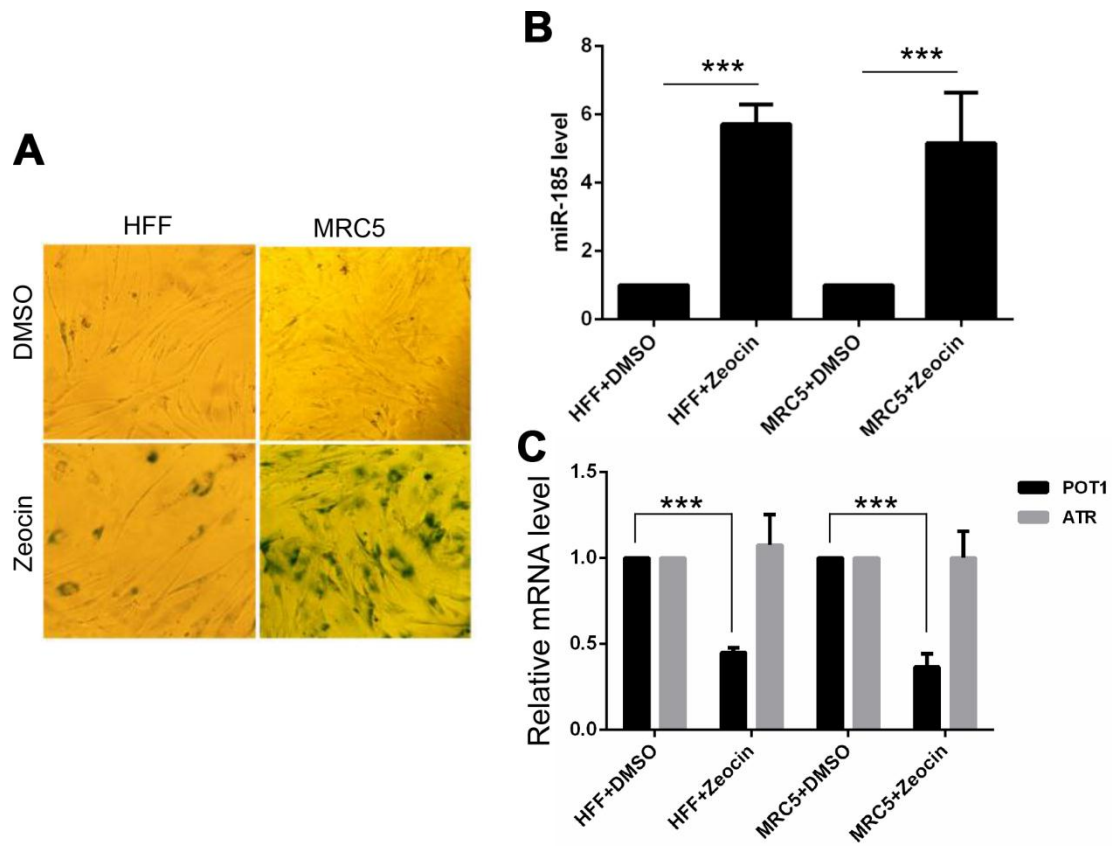

**Supplementary Figure 3. miR-185 and POT1 may negatively correlated during the Zeocin induced senescent process in primary cells.** (A) Early passage HFF and MRC5 cells that were treated by Zeocin were stained for b-galactosidase activity. (B, C) The relative expression of miR-185 (B), POT1 and ATR from cells of induced senescence (C) were detected and normalized using U6 and GAPDH level respectively.
